# Supplementary material for: Enzymatic synthesis and self-assembly of glycolipids: robust self-healing and wound closure performance of assembled soft materials
Source: PubMed Central journal article supplement — RSC Adv. 2018 Nov 5;8(65):37136–45. doi: 10.1039/c8ra07703g (PMC9089313; doi:10.1039/c8ra07703g), 2018-11-05

## **Enzymatic Synthesis and Self-Assembly of Glycolipids: Robust Self-healing and Wound Closure Performance of Assembled Soft Materials**

*Yadavali Siva Prasad,<sup>a</sup> Balasubramani Saritha,<sup>a</sup> Ayyapillai Tamizhanban,<sup>a</sup> Krishnamoorthy Lalitha,<sup>a</sup> Sakthivel Kabilan,<sup>a</sup> C. Uma Maheswari,<sup>a</sup> Vellaisamy Sridharan,<sup>b</sup> and Subbiah Nagarajan<sup>\*a,c</sup>*

<sup>a</sup> *Department of Chemistry, School of Chemical and Biotechnology, SASTRA Deemed University, Thanjavur – 613401, Tamil Nadu, India*

<sup>b</sup> *Department of Chemistry and Chemical Sciences, Central University of Jammu, Rahya-Suchani (Bagla), District-Samba, Jammu-181143, Jammu and Kashmir, India.*

<sup>c</sup> *Department of Chemistry, National Institute of Technology Warangal, Warangal -506004, Telangana, India.*

| Contents |                                                                                                                                  |          |
|----------|----------------------------------------------------------------------------------------------------------------------------------|----------|
| S.#      | Title                                                                                                                            | Page No. |
| 1        | <b>Table S1.</b> Solvents/ oils used for gelation studies.                                                                       | 3        |
| 2        | <b>Figure S1.</b> Images of oleogel and composite gel formed in paraffin oil and DMSO+Water (1:4).                               | 3        |
| 3        | <b>Figure S2</b> Images of oleogel formed by compound 2d & 2e in Eucalyptus oil                                                  | 4        |
| 4        | <b>Figure S3</b> SAXD patterns of xerogel derived from compound 3d.                                                              | 4        |
| 5        | <b>Figure S4</b> FTIR spectra of xerogel derived from compound 3d.                                                               | 4        |
| 6        | <b>Figure S5</b> Optical microscopy images of oleogel and composite gel.                                                         | 5        |
| 7        | <b>Figure S6</b> Effect of oleogel and composite gel on wound healing in experimental rats.                                      | 5        |
| 8        | <b>Figure S7</b> Pictures displaying wound closure at day1, 11, 17 and 21 respectively.                                          | 6        |
| 9        | <b>Figure S8</b> Biochemical profile of granulation tissue obtained from the skin-excised wound of different experimental groups | 6        |
| 10       | <b>Figure S9</b> <sup>1</sup> H NMR spectrum of glycolipid 3a in CDCl <sub>3</sub> +DMSO-d <sub>6</sub>                          | 7        |
| 11       | <b>Figure S10</b> <sup>13</sup> C NMR spectrum of glycolipid 3a in CDCl <sub>3</sub> +DMSO-d <sub>6</sub>                        | 7        |
| 12       | <b>Figure S11</b> <sup>1</sup> H NMR spectrum of glycolipid 3b in CDCl <sub>3</sub> +DMSO-d <sub>6</sub>                         | 8        |
| 1        | <b>Figure S12</b> <sup>13</sup> C NMR spectrum of glycolipid 3b in CDCl <sub>3</sub> +DMSO-d <sub>6</sub>                        | 8        |
| 3        | <b>Figure S13</b> <sup>1</sup> H NMR spectrum of glycolipid 3c in CDCl <sub>3</sub> +DMSO-d <sub>6</sub>                         | 9        |
| 14       | <b>Figure S14</b> <sup>13</sup> C NMR spectrum of glycolipid 3c in CDCl <sub>3</sub> +DMSO-d <sub>6</sub>                        | 9        |
| 15       | <b>Figure S15</b> <sup>1</sup> H NMR spectrum of glycolipid 3d in CDCl <sub>3</sub> +DMSO-d <sub>6</sub>                         | 10       |
| 16       | <b>Figure S16</b> <sup>13</sup> C NMR spectrum of glycolipid 3d in CDCl <sub>3</sub> +DMSO-d <sub>6</sub>                        | 10       |
| 17       | <b>Figure S17</b> ESI-MS spectra of glycolipid 3d in CDCl <sub>3</sub> +MeOH                                                     | 11       |
| 18       | <b>Figure S18</b> <sup>1</sup> H NMR spectrum of glycolipid 3e in CDCl <sub>3</sub> +DMSO-d <sub>6</sub>                         | 12       |
| 19       | <b>Figure S19</b> <sup>13</sup> C NMR spectrum of glycolipid 3e in CDCl <sub>3</sub> +DMSO-d <sub>6</sub>                        | 12       |
| 20       | <b>Figure S20</b> ESI-MS spectra of glycolipid 3e in CDCl <sub>3</sub> +MeOH                                                     | 13       |

**Table S1.** Solvents/ oils used for gelation studies.

| Entry | Oil/solvent       | Gelation of glycolipids |    |    |              |              |
|-------|-------------------|-------------------------|----|----|--------------|--------------|
|       |                   | 3a                      | 3b | 3c | 3d           | 3e           |
| 1     | Olive oil         | S                       | S  | S  | S            | S            |
| 2     | Eucalyptus oil    | S                       | S  | S  | G (2%)       | G (2%)       |
| 3     | Hazelnut oil      | S                       | S  | S  | S            | S            |
| 4     | Jojoba oil        | S                       | S  | S  | S            | S            |
| 5     | Sesame oil        | S                       | S  | S  | S            | S            |
| 6     | Soya bean oil     | S                       | S  | S  | S            | S            |
| 7     | Linseed oil       | S                       | S  | S  | PG           | PG           |
| 8     | Paraffin oil      | -                       | -  | PG | G (1% w/v)   | G (1.2% w/v) |
| 9     | Neem oil          | S                       | S  | S  | S            | S            |
| 10    | Castor oil        | S                       | S  | S  | S            | S            |
| 11    | Dichlorobenzene   | S                       | P  | P  | P            | P            |
| 12    | Benzene           | P                       | P  | P  | P            | P            |
| 13    | Cyclohexane       | I                       | I  | I  | P            | P            |
| 14    | N-Heptane         | I                       | I  | I  | I            | I            |
| 15    | 1,4- dioxane      | I                       | I  | I  | I            | I            |
| 16    | 1-Butanol         | P                       | P  | P  | P            | P            |
| 17    | Toluene           | P                       | P  | P  | P            | P            |
| 18    | Xylene            | P                       | P  | P  | P            | P            |
| 19    | Dimethylformamide | S                       | S  | S  | P            | P            |
| 20    | DMSO+Water (1:4)  | P                       | P  | P  | G (2.5% w/v) | G (2.5% w/v) |

S = solution; P = precipitate; I = insoluble; G = gel; PG = partial gel. Critical gelation concentration (CGC) is presented in parentheses [% (w/v)]

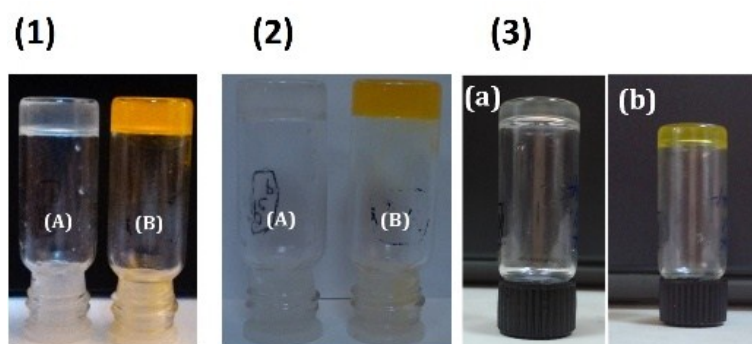**Figure S1.** (1,2) Image of oleogel (A) and composite gel (B) formed in paraffin oil and (3) images of gel (a) and composite gel (b) formed in DMSO+Water (1:4).

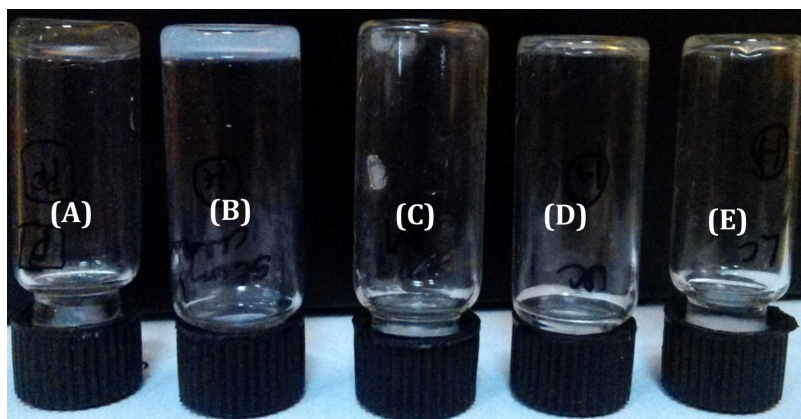

**Figure S2.** (A & B) Image of oleogel formed by compound **3d** & **3e** in Eucalyptus oil (C, D & E) Gel not formed by compounds **3a**, **3b** and **3c**.

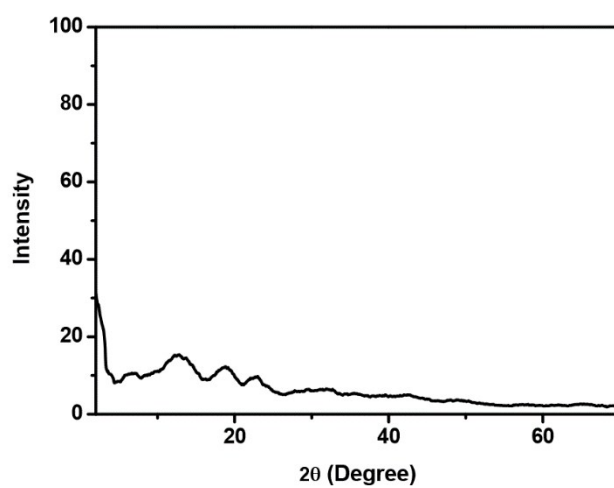

**Figure S3.** SAXD patterns of xerogel derived from compound **3d**.

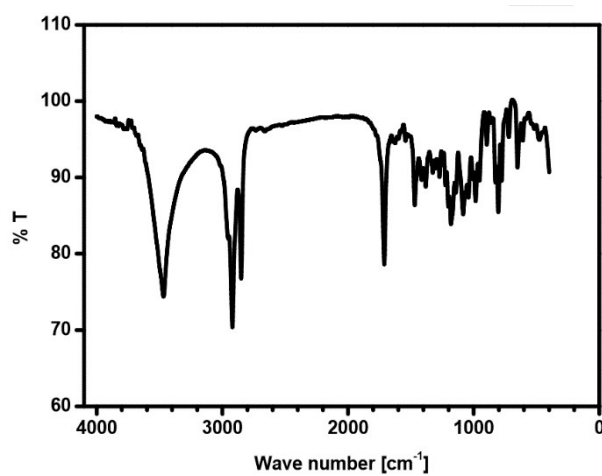

**Figure S4.** FTIR spectra of xerogel derived from compound **3d**.

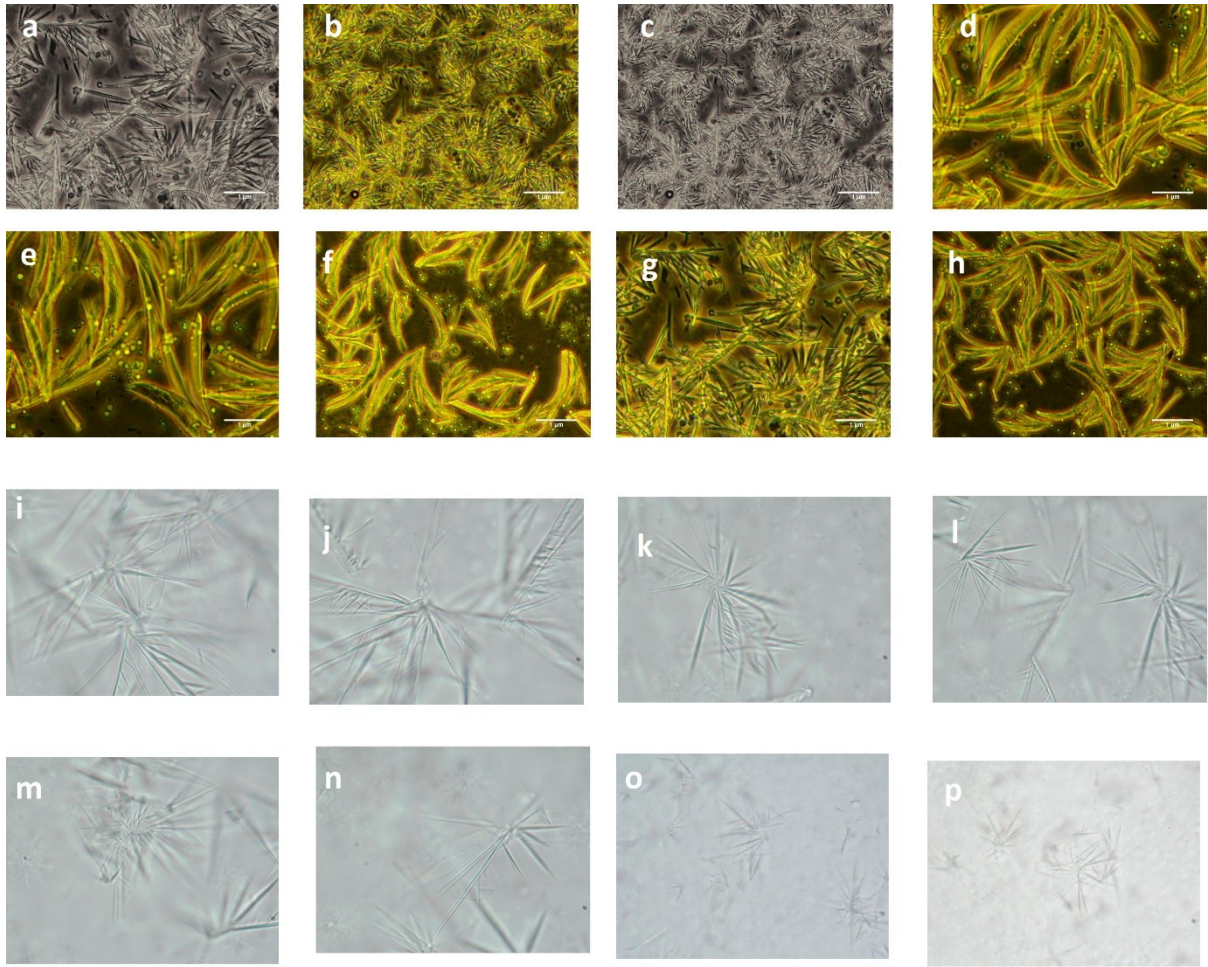

**Figure S5.** Optical microscopy images of (a-h) oleogel and (i-p) composite gel.

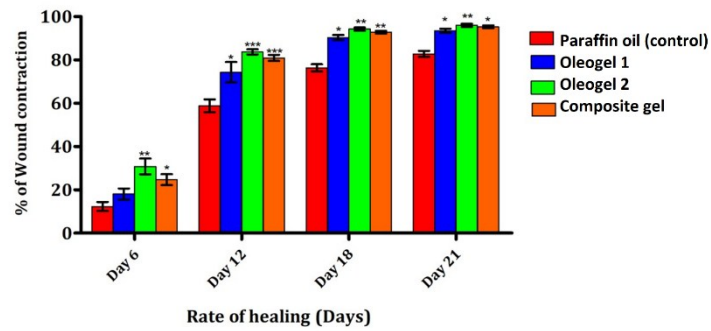

**Figure S6.** Effect of oleogel and composite gel on wound healing in experimental rats.



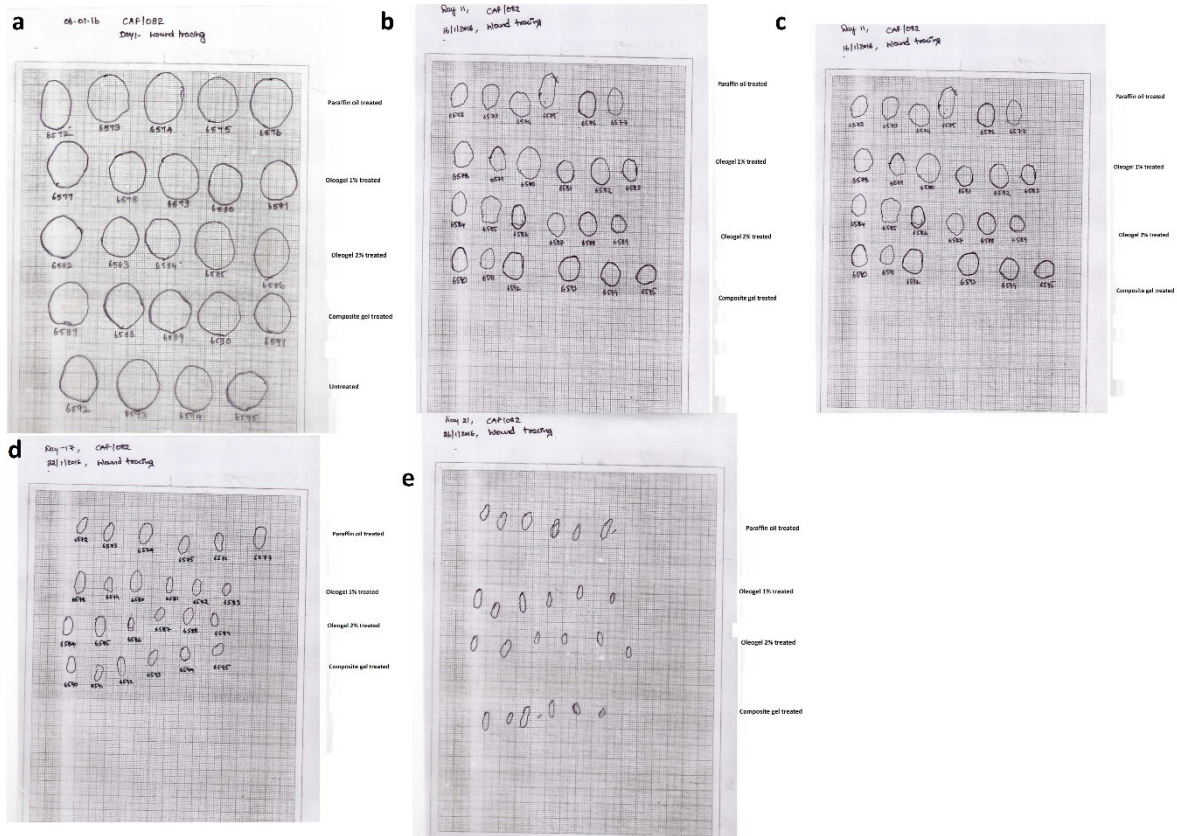

**Figure S7:** (a-e) Pictures displaying wound closure at day1, 11, 17 and 21 respectively.

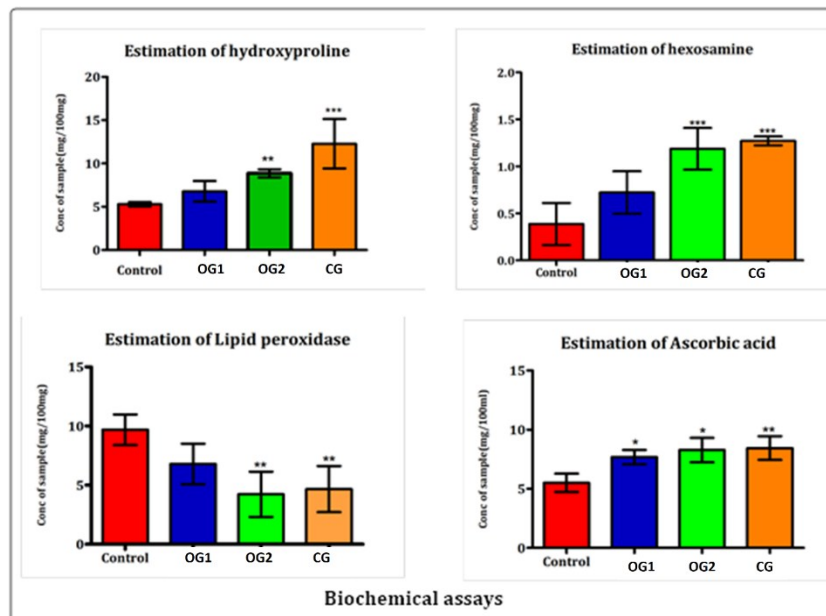

**Figure S8.** Biochemical profile of granulation tissue obtained from the skin-excised wound of different experimental groups. Values of mean  $\pm$  SE of each group.  $P < 0.05$  (\*),  $P < 0.01$  (\*\*),  $P < 0.001$  (\*\*\*). Comparison of treated groups with control groups. The results were analysed statistically using one-way analysis of variance (ANOVA) followed by Dunnett's test for multiple comparisons. OG1-Organogel 1; OG2-Organogel 2 and CG-Composite gel

**Figure S9.**  $^1\text{H}$  NMR spectrum of glycolipid **3a** in  $\text{CDCl}_3+\text{DMSO-d}_6$

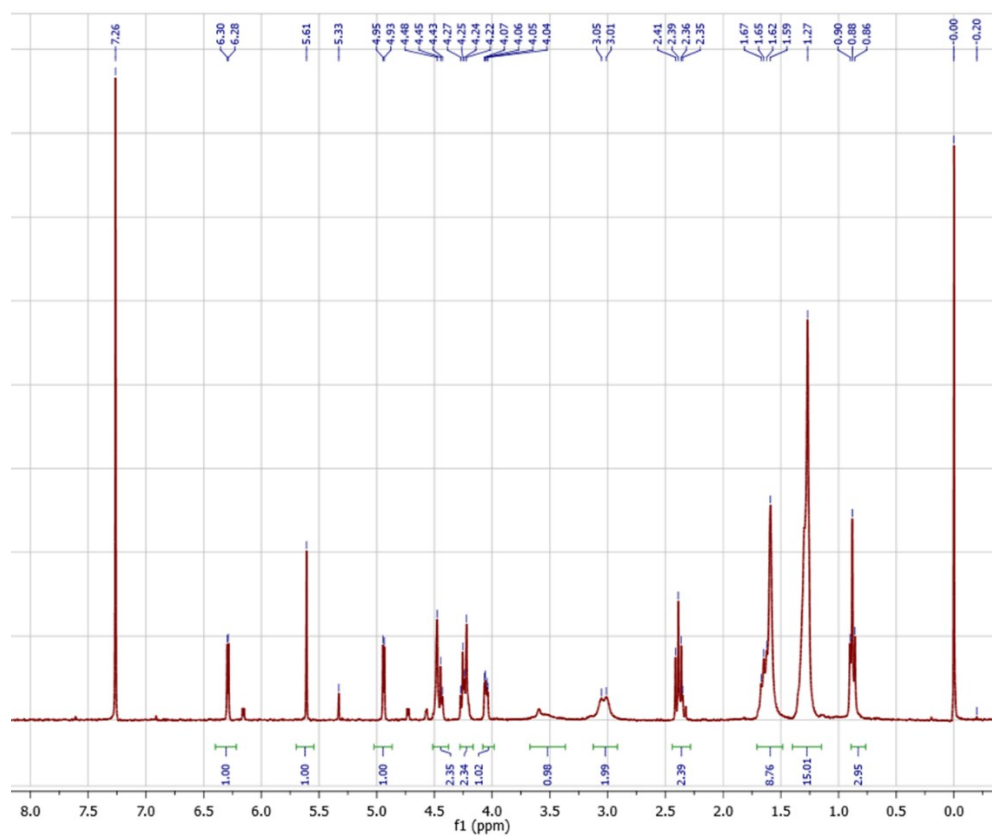

**Figure S10.**  $^{13}\text{C}$  NMR spectrum of glycolipid **3a** in  $\text{CDCl}_3+\text{DMSO-d}_6$

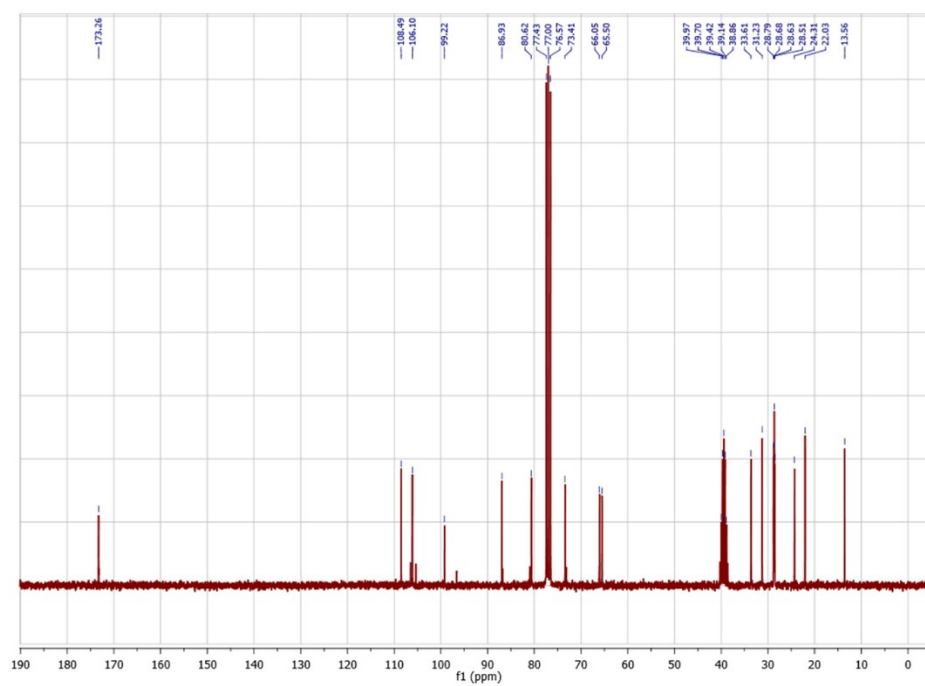

Figure S11.  $^1\text{H}$  NMR spectrum of glycolipid **3b** in  $\text{CDCl}_3+\text{DMSO-d}_6$

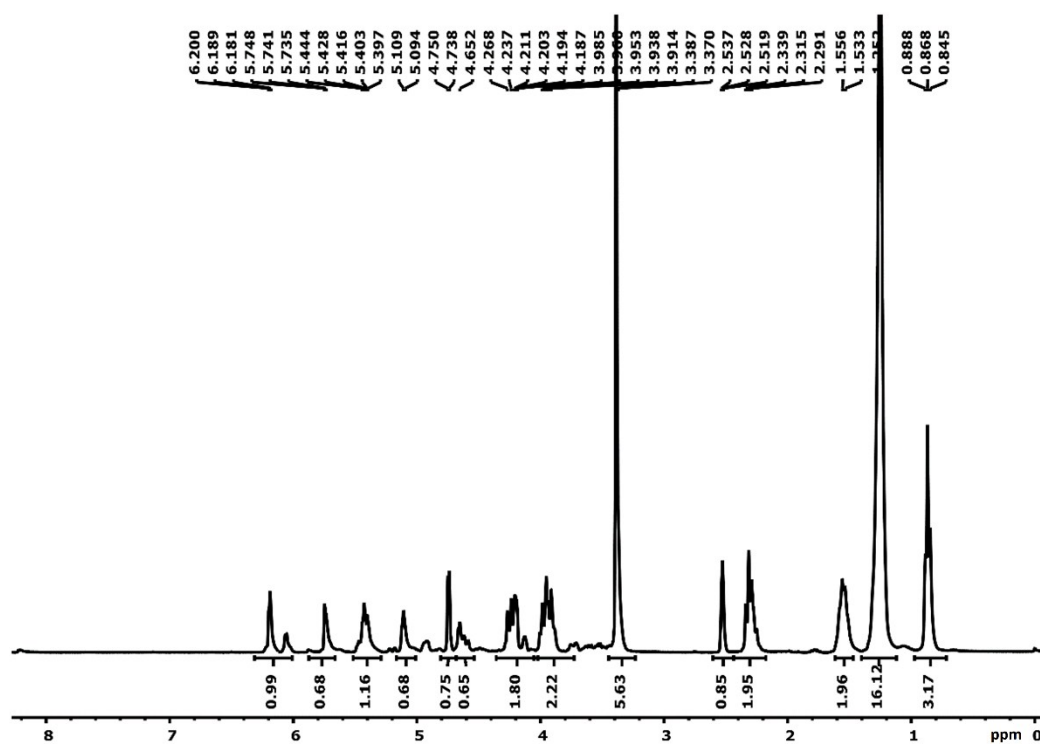

Figure S12.  $^{13}\text{C}$  NMR spectrum of glycolipid **3b** in  $\text{CDCl}_3+\text{DMSO-d}_6$

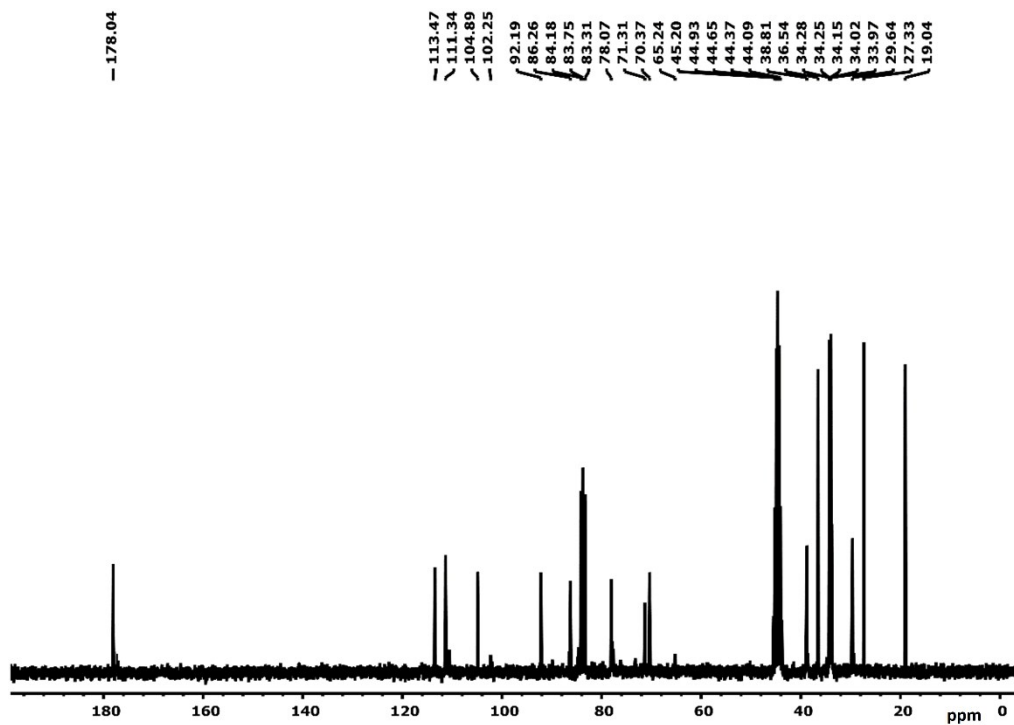



Figure S13.  $^1\text{H}$  NMR spectrum of glycolipid **3c** in  $\text{CDCl}_3+\text{DMSO}-d_6$

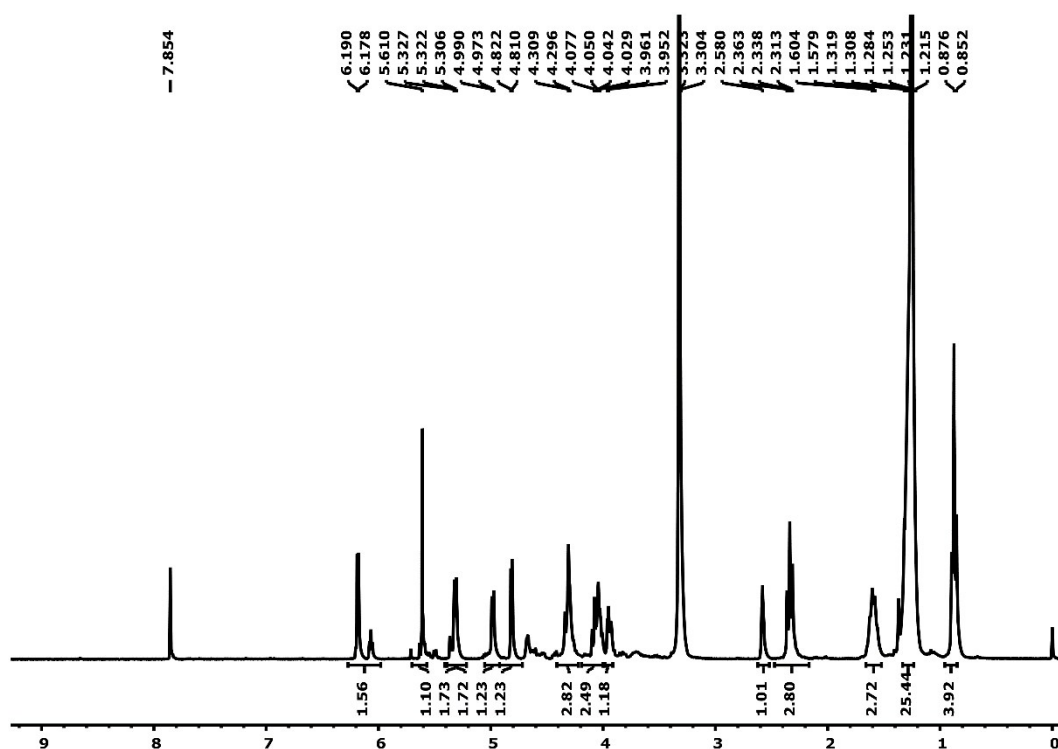

Figure S14.  $^{13}\text{C}$  NMR spectrum of glycolipid **3c** in  $\text{CDCl}_3+\text{DMSO}-d_6$

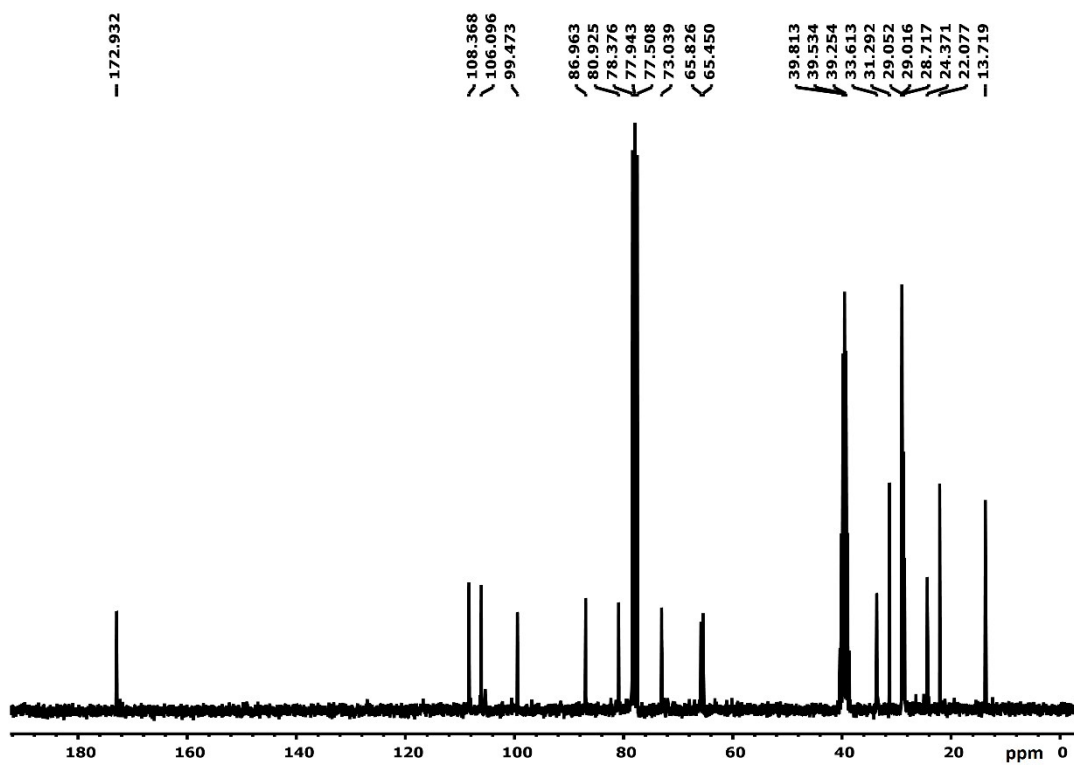

Figure S15.  $^1\text{H}$  NMR spectrum of glycolipid **3d** in  $\text{CDCl}_3$

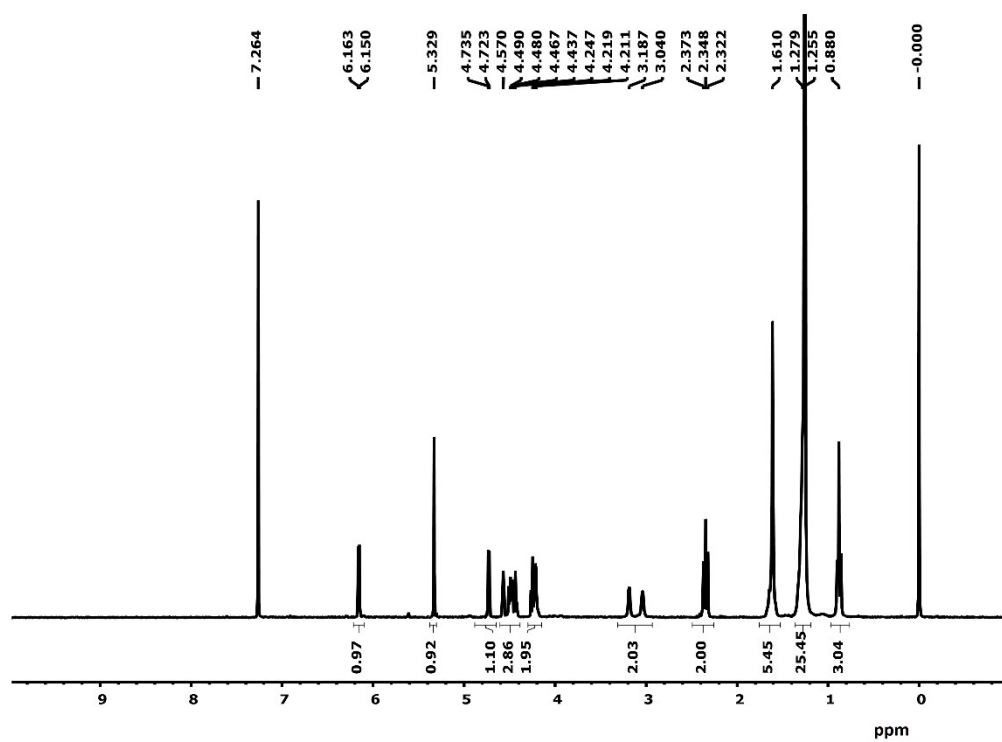

Figure S16.  $^{13}\text{C}$  NMR spectrum of glycolipid **3d** in  $\text{CDCl}_3$

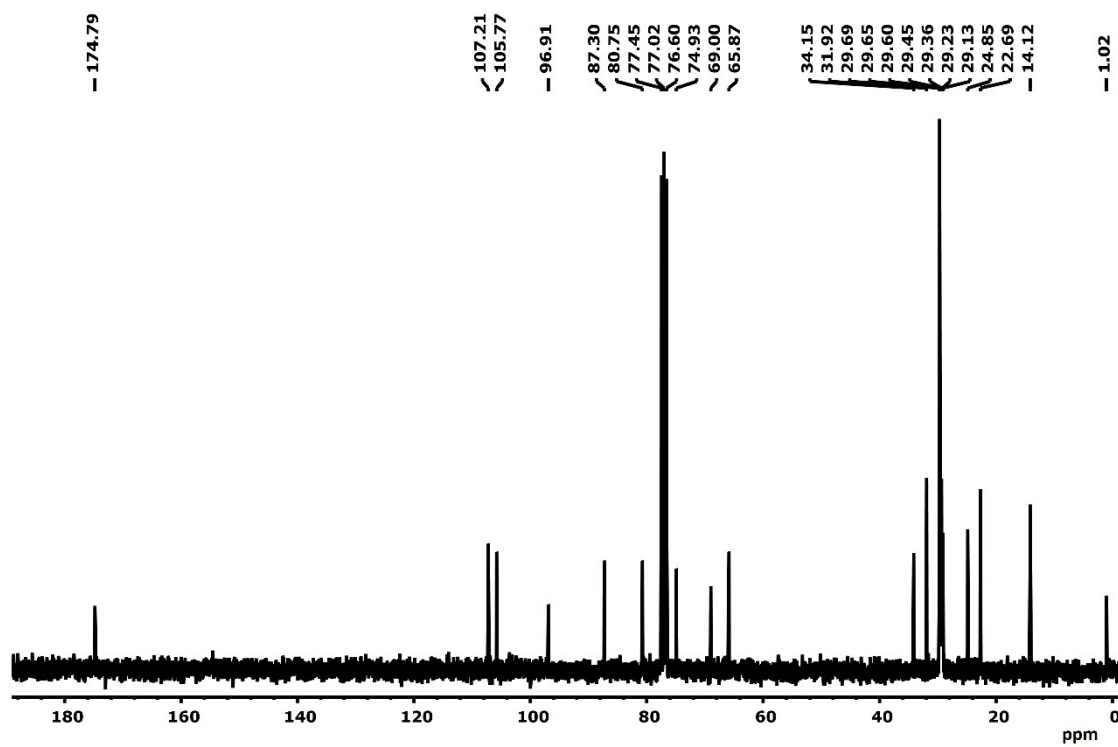

**Figure S17.** ESI-MS spectra of glycolipid **3d** in CDCl<sub>3</sub>+MeOH

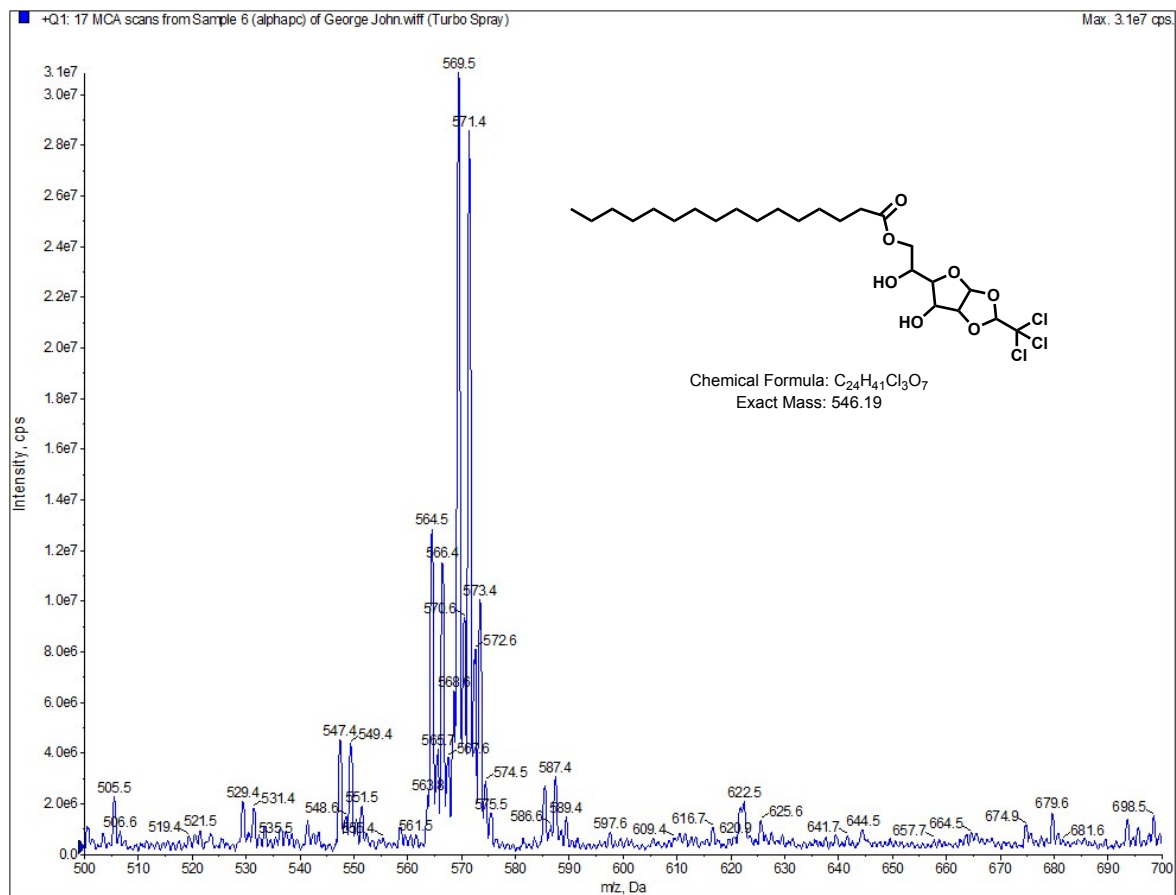

Figure S18.  $^1\text{H}$  NMR spectrum of glycolipid **3e** in  $\text{CDCl}_3$

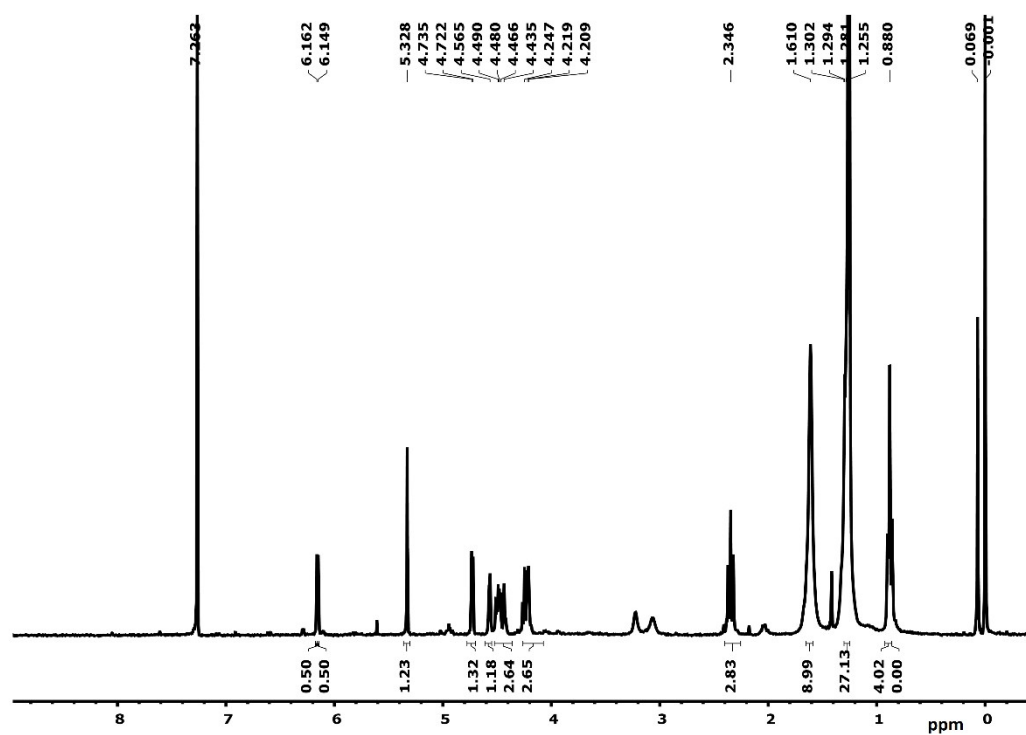

Figure S19.  $^{13}\text{C}$  NMR spectrum of glycolipid **3e** in  $\text{CDCl}_3$

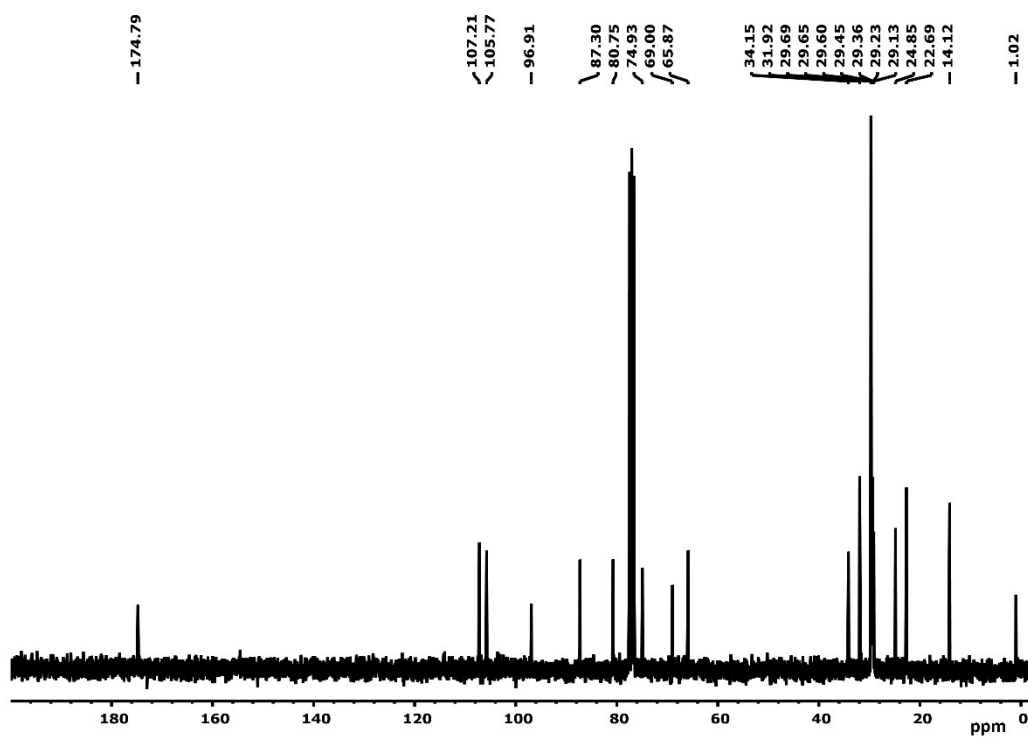

**Figure S20.** ESI-MS spectra of glycolipid **3a-e** in CDCl<sub>3</sub>+MeOH

**Glycolipid 3a**

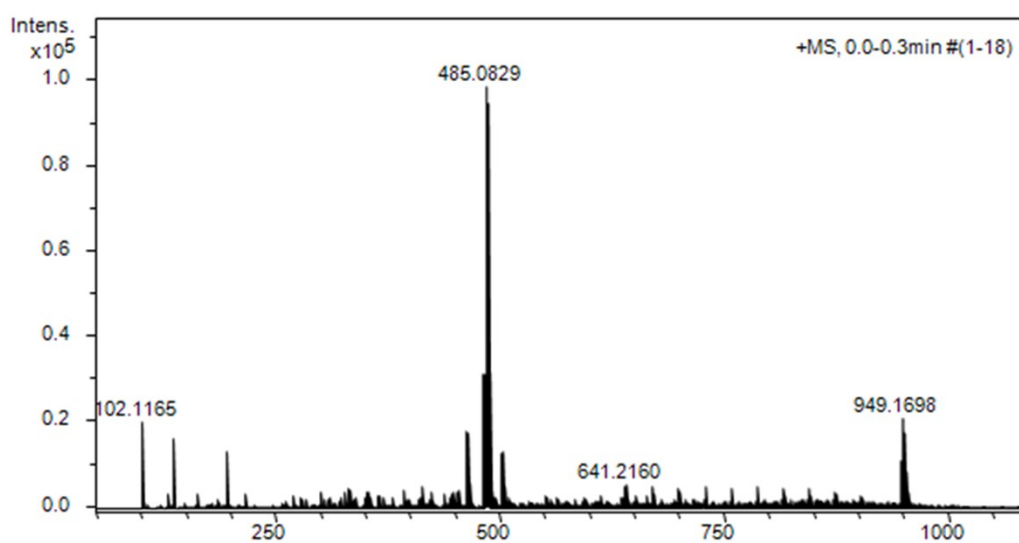

**Glycolipid 3b**

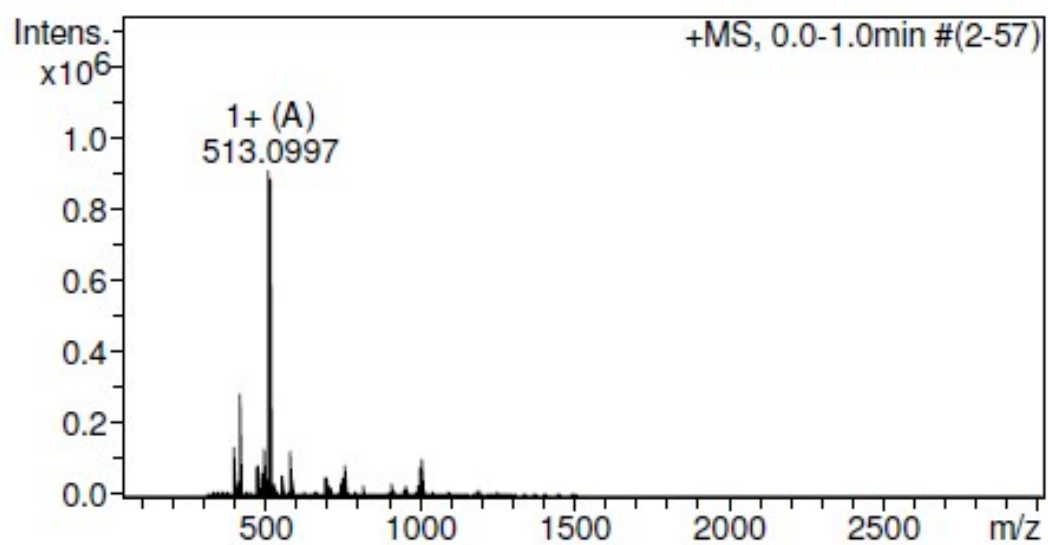

### Glycolipid 3c

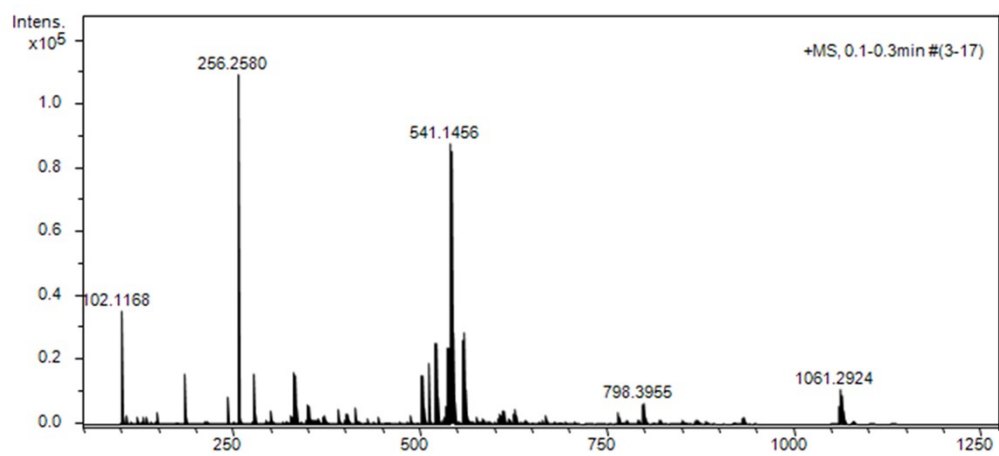

### Glycolipid 3d

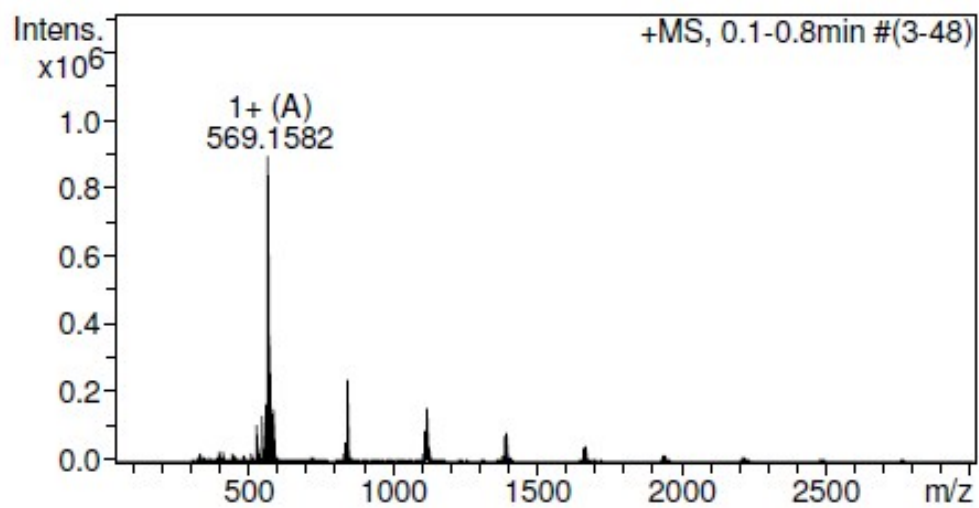



Sample 3e

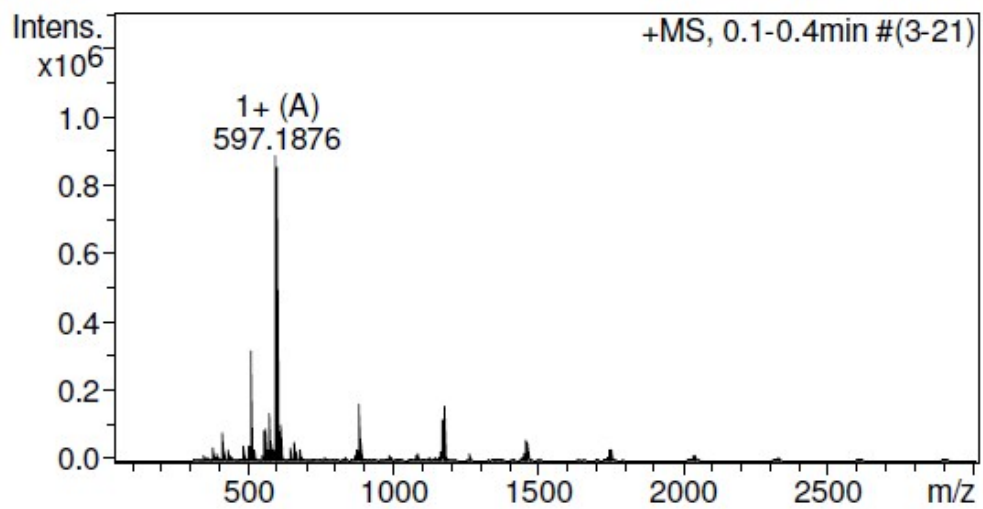

Supplement: RA-008-C8RA07703G-s001.pdf [file RA-008-C8RA07703G-s001.pdf]
